# Supplementary material for: Conditioning Ensemble Streamflow Prediction with the NorthAtlantic Oscillation improves skill at longer lead times
Source: Copernicus journal article supplement (doi:10.5194/hess-2020-604), 2020-12-14
Supplement: Supplementary file 1 [file Table_S1.xlsx]

## Sheet: Table_S1
Station	Location	Waterbody	Catchment	Region	Organisation	Latitude	Longitude	Mean Q (mm yr^-1)	Mean P (mm yr^-1)	Mean PE (mm yr^-1)	Area (km^2)	BFI (-)	RBI (-)	RR (-)	SAAR (mm)	FLATWET (-)	PEAT (-)	FOREST (-)	MSL (km)	S1085 (m km^-1)	TAYSLO (m km^-1)	GR4J X1 (mm)	GR4J X2 (mm d^-1)	GR4J X3 (mm)	GR4J X4 (d)	npKGE Cal CP (-)	NSE Cal CP (-)	PBIAS Cal CP (%)	log(X1 + X3) (mm)	CRPSS 1-month LT (-)
6013	Charleville	Dee	Glyde & Dee	East	OPW	53.856	-6.414	431.334	888.851	559.311	309.147	0.585391	0.169315	0.48532	873.08	0.6	0.0001	0.0244	53.967	2.58328	0.205344	198.984	0.249635	45.6672	2.38296	0.964868	0.890708	0.0297997	5.49983	0.192487
6014	Tallanstown	Glyde	Glyde & Dee	East	OPW	53.9217	-6.5502	507.813	932.244	558.946	270.376	0.610254	0.110254	0.558689	927.45	0.62	0.0006	0.044	34.392	2.78197	0.192251	191.955	0.60213	49.8052	3.44785	0.967652	0.866148	0.060188	5.48795	0.222306
6030	Ballygoly	Big	Piedmont	East	EPA	54.0264	-6.2443	806.039	1208.81	525.939	10.4004	0.373258	0.49532	0.75081	1156.77	0.61	0.3	0.0565	5.054	20.0912	1.7969	64.0318	0.736195	21.7025	1.77067	0.911324	0.53538	-0.102243	4.45125	0.0850917
7009	Navan Weir	Boyne	Boyne	East	OPW	53.6434	-6.6714	431.752	919.537	562.763	1658.19	0.697016	0.130826	0.520253	868.55	0.6	0.0701	0.043	81.019	0.5564	0.173253	227.864	0.675878	81.4234	2.44131	0.960234	0.901757	0.0682197	5.73427	0.249264
7012	Slane Castle	Boyne	Boyne	East	OPW	53.7069	-6.5624	510.12	939.299	560.339	2460.27	0.66054	0.136955	0.54785	890.06	0.61	0.0512	0.0402	93.668	0.69738	0.171978	34.2955	-0.0103688	248.265	2.54297	0.965801	0.911755	0.0127653	5.64389	0.257966
9011	Frankfort	Slang	Liffey	East	EPA	53.2973	-6.2473	457.427	894.796	576.895	5.46	0.561896	0.367395	0.617014	772.95	0.54	0	0.0491	5.582	31.1562	1.53322	438.288	0.625258	16.0773	1.08087	0.868322	0.599822	-0.159588	6.1189	0.165996
12001	Scarawalsh	Slaney	Slaney	South-East	OPW	52.548	-6.5505	682.701	1127.15	566.258	1030.75	0.67433	0.195581	0.561696	1167.31	0.54	0.07	0.1143	89.282	2.09929	0.344662	52.9247	0.758739	499.996	1.84608	0.911389	0.830379	0.0603558	6.31521	0.32575
14007	Derrybrock	Stradbally	Barrow	Midlands	OPW	53.039	-7.0851	502.187	936.334	562.3	118.591	0.630697	0.240103	0.568287	814.07	0.57	0	0.0935	20.533	3.9219	0.664811	357.914	-0.114187	54.7529	1.7321	0.959552	0.877132	-0.0117479	6.02264	0.210912
14019	Levitstown	Barrow	Barrow	East	OPW	52.935	-6.9504	359.542	904.515	570.037	1697.28	0.627961	0.158889	0.459773	861.46	0.58	0.1262	0.0994	83.711	0.74401	0.162901	381.189	0.184213	30.7827	2.91091	0.917846	0.843594	0.150816	6.02095	0.191558
15001	Annamult	Kings	Nore	South-East	OPW	52.5484	-7.2004	467.125	978.168	574.838	444.345	0.513495	0.303809	0.499767	935.24	0.58	0.0036	0.06	44.911	3.57213	1.04601	166.426	-0.157816	54.0976	1.97677	0.954373	0.904854	-0.0706499	5.396	0.181189
15003	Dinin Br.	Dinin	Nore	South-East	OPW	52.7146	-7.2922	605.289	1042.54	551.186	299.166	0.392215	0.467831	0.602658	933.86	0.57	0	0.1722	34.798	3.85893	0.886323	133.442	0.270238	21.6702	1.94111	0.93931	0.810305	0.0362323	5.04415	0.106416
15005	Durrow Ft. Br.	Erkina	Nore	Midlands	OPW	52.8471	-7.3986	479.801	906.231	566.617	379.368	0.701459	0.112333	0.536683	884.96	0.59	0.015	0.0711	39.33	1.98354	0.352004	94.7984	0.842501	202.515	2.40521	0.963881	0.911693	0.0400763	5.69479	0.326989
15006	Brownsbarn	Nore	Nore	South-East	OPW	52.5002	-7.0922	491.881	989.085	568.601	2418.27	0.627195	0.183416	0.528909	941.92	0.58	0.0227	0.1058	117.42	0.94122	0.212384	32.3325	-1.04622	242.318	2	0.95809	0.912057	0.0481853	5.6155	0.251784
15007	Kilbricken	Nore	Nore	Midlands	OPW	52.9584	-7.46227	673.146	1158.04	555.349	339.76	0.500415	0.272133	0.611264	1123.04	0.6	0.1024	0.2132	38.223	1.05175	0.278351	144.73	0.35079	49.6626	1.78878	0.928485	0.851044	-0.134049	5.26988	0.149455
16008	New Bridge	Suir	Suir	Mid-West	OPW	52.4592	-7.9975	698.545	1070.01	570.631	1090.25	0.629613	0.126318	0.644848	1029.63	0.59	0.0465	0.0835	68.615	0.92085	0.249177	32.9213	1.40153	237.21	2.16101	0.939927	0.910177	-0.0316411	5.59891	0.251704
16009	Caher Park	Suir	Suir	Mid-West	OPW	52.3578	-7.923	650.235	1108.06	572.395	1582.69	0.637281	0.14502	0.588352	1078.57	0.59	0.0527	0.0955	85.436	1.00463	0.224465	16.9564	-0.374684	363.006	1.99908	0.95817	0.92751	0.0623074	5.94007	0.24447
16011	Clonmel	Suir	Suir	Mid-West	OPW	52.3516	-7.69361	695.394	1140.75	571.476	2143.67	0.662969	0.148937	0.648462	1124.95	0.59	0.0819	0.1227	116.477	0.95268	0.200156	11.5355	-0.494749	412.079	1.99956	0.949673	0.917206	0.0586394	6.04882	0.240612
16012	Tar Br.	Tar	Suir	Mid-West	OPW	52.2728	-7.84228	915.558	1332.66	565.577	229.627	0.637111	0.2692	0.744741	1320.79	0.6	0.2158	0.2656	32.271	5.19993	0.500919	2.9617	-0.143932	499.989	1.51911	0.863721	0.74331	0.12916	6.22049	0.210642
16013	Fourmilewater	Nire	Suir	South-East	OPW	52.2732	-7.75646	1131.77	1329.38	543.505	93.5832	0.492842	0.394499	0.920258	1471.29	0.58	0.2065	0.1829	18.366	24.5565	6.57516	138.075	1.72058	40.9148	1.50723	0.871378	0.667162	-0.365016	5.18733	0.116613
18002	Ballyduff	Blackwater	Blackwater (Munster)	South-East	OPW	52.1446	-8.0532	779.791	1312.6	576.301	2333.69	0.616047	0.216291	0.626538	1200.37	0.62	0.0528	0.1447	129.081	1.34264	0.191828	479.473	0.0223126	72.9801	2.12206	0.956142	0.895785	0.0531487	6.31437	0.192883
18003	Killavullen	Blackwater	Blackwater (Munster)	South-West	OPW	52.1489	-8.5163	847.866	1410.71	574.326	1256.7	0.543281	0.283033	0.640648	1298.98	0.63	0.0624	0.1217	89.939	1.65818	0.233059	13.2832	-1.55466	229.886	1.90468	0.946895	0.88102	0.081707	5.49376	0.16439
18006	CSET Mallow	Blackwater	Blackwater	South-West	EPA	52.1274	-8.6936	636.356	1435.67	572.898	1054.78	0.496993	0.339953	0.688457	1331.55	0.63	0.0743	0.1249	75.525	1.91796	0.268536	258.203	0.215836	36.9765	1.99999	0.952381	0.914046	-0.0371358	5.68758	0.133602
18050	Duarrigle	Blackwater	Blackwater	South-West	EPA	52.0481	-9.4993	763.903	1654.59	569.158	248.829	0.389058	0.473155	0.666863	1469.42	0.64	0.1843	0.1206	36.941	3.19465	0.532819	250.131	-0.145016	29.9159	1.99997	0.950025	0.857899	0.0007298	5.63496	0.107087
22006	Flesk	Flesk (Laune)	Laune	South-West	OPW	52.0966	-9.0953	1313.51	1914.92	566.785	328.815	0.38925	0.467668	0.747428	1819.32	0.66	0.4947	0.1557	45.138	9.42058	0.696612	274.786	0.230193	23.6669	1.99999	0.946626	0.89092	0.047165	5.69861	0.0864369
22035	Laune Br.	Laune	Laune	South-West	OPW	52.0615	-9.6164	1562.42	2011.12	569.307	559.655	0.637621	0.0843907	0.811048	2009.91	0.67	0.4823	0.1637	56.299	7.57974	0.43193	3.49909	0.71038	361.839	3.7447	0.965667	0.930602	0.0430363	5.90082	0.176911
23002	Listowel	Feale	Feale	South-West	OPW	52.4423	-9.4757	1010.48	1507.66	567.761	646.848	0.326927	0.506307	0.739392	1345	0.63	0.2362	0.2617	50.536	4.30847	0.685014	21.8992	0.298348	32.9965	1.89171	0.951367	0.875747	-0.0454232	4.00544	0.065194
24008	Castleroberts	Maigue	Maigue	Mid-West	OPW	52.5433	-8.7672	501.533	1020.16	585.337	806.044	0.524882	0.258754	0.501541	939.47	0.6	0.0008	0.0242	56.203	2.13954	0.299319	169.382	-0.132459	41.1581	2.10059	0.950698	0.906884	0.0548789	5.34968	0.192241
24030	Danganbeg	Deel	Shannon Est Sth	Mid-West	EPA	52.4091	-9.0025	511.883	1107.59	584.627	258.88	0.443983	0.368306	0.527312	1051.24	0.61	0.0063	0.0279	27.155	2.40385	0.387638	159.388	-0.119803	29.534	1.86974	0.942849	0.865438	0.0622921	5.24134	0.155574
25001	Annacotty	Mulkear	Mulkear	Mid-West	OPW	52.6695	-8.529	751.244	1213.52	566.594	647.558	0.51699	0.293424	0.635486	1166.21	0.59	0.0648	0.2012	53.239	4.07314	0.376084	13.2667	-0.180024	125.325	1.75222	0.933122	0.879538	0.00500544	4.93153	0.131504
25002	Barrington's Br.	Newport	Mulkear	Mid-West	OPW	52.6448	-8.4748	810.508	1302.56	556.701	221.609	0.468193	0.346435	0.656171	1299.96	0.59	0.114	0.3337	40.894	6.87652	0.821994	11.1271	-0.541779	104.83	1.63163	0.900204	0.853459	0.10003	4.75322	0.106271
25006	Ferbane	Brosna	Brosna	Midlands	OPW	53.2701	-7.8278	426.231	955.655	565.681	1162.76	0.710307	0.131849	0.520108	931.99	0.63	0.1007	0.0753	67.324	0.75425	0.160127	320.82	0.598328	62.0753	2.15183	0.9449	0.888107	0.055064	5.94776	0.220448
25030	Scarriff	Graney	Graney	Mid-West	OPW	52.9085	-8.5331	881.522	1239.34	565.987	280.021	0.52415	0.147941	0.757887	1183.81	0.61	0.1623	0.3584	37.319	3.94408	0.261203	9.69435	0.834122	88.381	2.5985	0.958387	0.902089	-0.0287474	4.58574	0.11521
25034	Rochfort	L. Ennell Trib	Shannon Est Sth	Midlands	EPA	53.4659	-7.3744	557.937	1027.23	556.821	10.77	0.733857	0.131089	0.622773	968.6	0.65	0	0.0138	2.836	2.57182	0.549592	45.0234	2.35945	396.074	1.76946	0.950323	0.877709	0.0265715	6.08927	0.301928
26021	Ballymahon	Inny	Inny	Midlands	OPW	53.5627	-7.7577	546.082	1015.36	558.973	1098.78	0.816286	0.0691767	0.555541	945.25	0.66	0.075	0.0737	90.239	0.19869	0.13351	35.1749	0.0270047	489.292	2.52651	0.965707	0.930157	0.0400182	6.26238	0.330661
26058	Ballinrink Br.	Inny Upper	Inny	East	EPA	53.776	-7.2505	646.216	1037.95	551.986	59.9768	0.724968	0.133041	0.60182	973.5	0.65	0.0101	0.0418	14.712	5.53459	0.337995	64.9721	1.81788	286.392	1.93968	0.941136	0.76722	0.00504589	5.86182	0.295372
27002	Ballycorey	Fergus	Fergus	Mid-West	OPW	52.8702	-8.9744	695.355	1405.27	581.114	564.271	0.682446	0.0613745	0.493645	1336.35	0.62	0.038	0.1195	40.392	1.21831	0.170204	23.6714	-7.51519	274.38	3.99999	0.957637	0.88158	0.0331403	5.69727	0.277469
30007	Ballygaddy	Clare	Corrib	West	OPW	53.5309	-8.8754	690.229	1171.55	564.24	469.896	0.638746	0.189093	0.622474	1115.06	0.7	0.1921	0.0413	50.334	1.08551	0.226748	12.4828	-0.62072	314.777	2.04237	0.954522	0.878867	0.0359288	5.79075	0.232264
32012	Newport Weir	Newport	Newport	West	EPA	53.8894	-9.5251	1230.37	1698.7	548.569	146.162	0.551963	0.164458	0.763321	1784.36	0.72	0.5285	0.2514	31.358	4.10196	0.224473	8.1826	0.459293	197.465	2.106	0.954845	0.908492	0.0498721	5.32617	0.107595
33001	Glenamoy	Glenamoy	Glenamoy	West	EPA	54.24	-9.696	1184.51	1674.98	544.807	76.1196	0.275567	0.600993	0.733666	1466.61	0.73	0.637	0.2523	17.647	10.449	2.71358	1.00026	-0.434963	29.8061	1.80091	0.928856	0.803822	-0.122526	3.42772	0.0264912
34001	Rahans	Moy	Moy	West	OPW	54.1036	-9.157	907.786	1349.89	555.374	1974.76	0.76467	0.0840874	0.673073	1322.66	0.73	0.3151	0.0941	88.856	0.71941	0.174183	10.0895	-0.215197	500	2.40971	0.961468	0.929685	0.0924729	6.23459	0.255012
35002	Billa Br.	Owenbeg	Owenmore	Border	OPW	54.1794	-8.5532	1343.16	1684.73	530.735	88.8201	0.397183	0.470891	0.834411	1380.56	0.72	0.2455	0.3404	25.658	13.2628	0.723611	219.195	0.200884	16.4392	1.99999	0.908517	0.772642	0.140252	5.46228	0.0868264
35005	Ballysadare	Ballysadare	Owenmore	Border	OPW	54.2093	-8.5091	838.717	1323.16	550.138	639.656	0.601232	0.160774	0.653826	1198.32	0.71	0.114	0.1404	41.034	1.15372	0.143896	8.30371	-0.554871	219.018	1.95221	0.96578	0.939546	0.0555214	5.42637	0.158185
36015	Anlore	Finn	Erne	Border	OPW	54.1765	-7.17628	594.728	1089.48	551.208	153.058	0.397491	0.308514	0.661414	1090.72	0.68	0.0226	0.0324	24.454	3.07572	0.354642	51.6603	0.365618	13.9648	2.39532	0.928876	0.794038	-0.132732	4.18396	0.0888333
36019	Belturbet	Erne	Erne	Border	OPW	54.0974	-7.4516	560.395	1087.87	549.994	1491.76	0.758554	0.0437653	0.571678	971.21	0.67	0.0151	0.0425	78.577	1.1912	0.163824	48.6669	-0.212805	379.078	3.99999	0.948917	0.913675	0.14381	6.05853	0.345248
38001	Clonconwal Ford	Owenea	Owenea	Border	OPW	54.7818	-8.3647	1379.72	1942.91	518.871	111.245	0.265564	0.57536	0.822399	1753.2	0.7	0.344	0.2172	25.739	5.95043	0.661158	22.5172	0.416144	15.2368	1.99999	0.946309	0.854448	0.0212852	3.63109	0.0320347
39009	Aghawoney	Fern O/L	Leannan	Border	OPW	55.0438	-7.72066	1101.68	1644.6	527.817	206.826	0.469538	0.175785	0.790016	1570.26	0.7	0.4094	0.1233	32.898	5.22253	0.260607	9.74369	0.686433	91.4408	3.07237	0.969522	0.932255	0.00289996	4.61695	0.0964048
